# Supplementary material for: A case report: New-onset refractory status epilepticus in a patient with FASTKD2-related mitochondrial disease
Source: PubMed Central journal article supplement (PMC9875587; doi:10.3389/fneur.2022.1063733), 2023-01-11
Supplement: Image_1.pdf [file Image_1.pdf]

**Supp. Fig 1.: Evolution of neuropsychological performance of a patient with FASTKD2-related mitochondrial disease**

|                            | <b>Age 14 years,</b><br>During admission at the time of NORSE | <b>Age 14 years,</b><br>Follow-Up 3 months after NORSE | <b>Age 22 years,</b><br>During presurgical evaluation |
|----------------------------|---------------------------------------------------------------|--------------------------------------------------------|-------------------------------------------------------|
| <b>COGNITION</b>           | <i>WISC-IV</i>                                                | <i>WISC-IV</i>                                         | <i>WAIS</i>                                           |
| Intelligence quotient      | <b>56 [52-62] (normal 84-115) ; PR 0.2 (16-84)</b>            | <b>81 [70-88] (84-115) ; PR 10.3 (16-84)</b>           |                                                       |
| Vocabulary                 | <b>PR 4.8* (16-84)</b>                                        | PR 25.2 (16-84)                                        | IQ 95 (85-115)                                        |
| Visual Construction        | <b>PR 0.3* (16-84)</b>                                        |                                                        | IQ 90 (85-115)                                        |
| Visual convergent thinking | <b>PR 0.7* (16-84)</b>                                        | PR 25.2 (16-84)                                        | IQ 90 (85-115)                                        |
| <b>MEMORY</b>              | <i>VLMT; DCS</i>                                              | <i>VLMT,DCS</i>                                        | <i>VLMT</i>                                           |
| Verbal Memory              | <b>PR &lt; 5* (16-84)</b>                                     |                                                        | IQ 85 (85-115)                                        |
| Figural Memory             | PR 30(16-84)                                                  |                                                        | IQ 103 (85-115)                                       |
| <b>ATTENTION</b>           | <i>TAP</i>                                                    | <i>TAP</i>                                             | <i>TAP</i>                                            |
| Divided attention          | PR 21(16-84)                                                  |                                                        | IQ 85 (85-115)                                        |
| Mental processing speed    | <b>impaired</b>                                               | <b>PR 5.5* (16-84)</b>                                 | <b>IQ 55* (85-115)</b>                                |
| Alertness phasic           | PR 66 (16-84)                                                 |                                                        | <b>IQ 73* (85-115)</b>                                |
| <b>EXECUTIVE FUNCTION</b>  | <i>TL-3 , WISC-IV</i>                                         | <i>TL-3, WISC-IV</i>                                   | <i>Trail Making Test B, WAIS</i>                      |
| Working Memory visual      | <b>PR 0.2*(16-84)</b>                                         | <b>PR 11.5* (16-84)</b>                                | IQ 94 (85-115)                                        |
| Working Memory verbal      |                                                               |                                                        | IQ 90 (85-115)                                        |
| Semantic fluency           |                                                               |                                                        | <b>IQ 65* (85-115)</b>                                |
| Inhibition control         | <b>PR &lt; 1* (16-84)</b>                                     |                                                        | <b>IQ 64* (85-115)</b>                                |
| Flexibility                | average                                                       |                                                        | <b>IQ 55* (85-115)</b>                                |

\* Values below average

DCS...diagnostics for cerebral injuries, PR... percentage range, TAP...Test of Attentional Performance, TL-3...tower of london test; VLMT...verbal learning and memory test, WAIS... Wechsler Adult Intelligence Scale, WISC-IV (Wechsler Intelligence Scale for Children, 4th Edition)
